# Supplementary material for: Place of birth and postnatal transfers in infants with congenital diaphragmatic hernia in England and Wales: a descriptive observational cohort study
Source: HighWire-hosted journal article supplement (doi:10.1136/archdischild-2023-326152), 2024-02-05
Supplement: archdischild-2023-326152supp001_data_supplement.pdf [file archdischild-2023-326152supp001_data_supplement.pdf]

**Supplementary Appendix****Contents**

|                                                                                                                                                |        |
|------------------------------------------------------------------------------------------------------------------------------------------------|--------|
| Supplement 1: Expert group and explorative work                                                                                                | Page 2 |
| Supplement 2: Diagnostic codes for CDH                                                                                                         | Page 3 |
| Supplement 3: Discharge destination, number of neonatal episodes and length of neonatal stay for infants born outside a neonatal surgical unit | Page 4 |
| Supplement 4: Survival to surgical centre for the whole cohort                                                                                 | Page 5 |
| Supplement 5: Sub-analysis of discharge outcomes                                                                                               | Page 6 |
| Supplement 6: UK Neonatal Collaborative units in England and Wales                                                                             | Page 7 |

### Supplement 1: Expert group and explorative work

We engaged healthcare professionals including neonatologists and neonatal surgeons from ten UK operational delivery networks. We did not involve patients or members of the public due to the remit of this work being to study the current health system pathways.

Meetings took place virtually and included both 1-1 interviews and group interviews, all facilitated by BNM. During the meeting, we discussed the different pathways for babies with congenital anomalies across England and Wales.

| <b>Role</b>                                    | <b>Neonatal Network</b> |
|------------------------------------------------|-------------------------|
| Consultant Paediatric and Neonatal Surgeon     | Thames Valley & Wessex  |
| Clinical Research Fellow in Paediatric Surgery | Thames Valley & Wessex  |
| Consultant Paediatric and Neonatal Surgeon     | North West              |
| Consultant Paediatric and Neonatal Surgeon     | North West              |
| Clinical Research Fellow in Paediatric Surgery | North West              |
| Consultant Paediatric and Neonatal Surgeon     | London                  |
| Consultant Paediatric and Neonatal Surgeon     | West Midlands           |
| Consultant Paediatric and Neonatal Surgeon     | London                  |
| Consultant Paediatric Intensive Care           | London                  |
| Consultant Neonatologist                       | South West              |
| Consultant Neonatologist                       | London                  |
| Consultant Neonatologist                       | Thames Valley & Wessex  |
| Consultant Neonatologist                       | London                  |
| Consultant Neonatologist                       | Yorkshire & Humber      |
| Consultant Neonatologist                       | Yorkshire & Humber      |

**Supplement 2: Diagnostic codes for CDH**

Meets definition if any of the following are present in diagnosis table OR  
principal diagnosis at discharge OR diagnoses day:

|          |                                                         |
|----------|---------------------------------------------------------|
| 10246    | Congenital Diaphragmatic Hernia                         |
| 10694    | Morgagni Diaphragmatic Hernia                           |
| 10905    | Recurrent Congenital Diaphragmatic Hernia               |
| 11597    | Other repair of diaphragmatic hernia                    |
| 11657    | Primary repair of congenital diaphragmatic hernia       |
| 11660    | Prosthetic repair of congenital diaphragmatic hernia    |
| 100044   | Congenital Diaphragmatic Hernia                         |
| 200602   | Other specific repair of diaphragmatic hernia           |
| 1001921  | Repair of diaphragmatic hernia using thoracic approach  |
| 1001923  | Repair of diaphragmatic hernia using abdominal approach |
| 1001924  | Other specific repair of diaphragmatic hernia           |
| 1006148  | Congenital Diaphragmatic Hernia                         |
| 1006671  | Repair of Congenital Diaphragmatic Hernia               |
| 10001925 | Unspecified repair of diaphragmatic hernia              |

**Supplement 3: Discharge destination, number of neonatal episodes and length of neonatal stay for infants born outside a neonatal surgical unit**

| First neonatal unit          | Discharge destination from neonatal unit | Number of neonatal episodes* | n  | Length of neonatal stay (LOS), days |      |       |             |             |
|------------------------------|------------------------------------------|------------------------------|----|-------------------------------------|------|-------|-------------|-------------|
|                              |                                          |                              |    | Median                              | Q1   | Q3    | Minimum LOS | Maximum LOS |
| Tertiary designated unit     | Standalone surgical centre               | 1                            | 73 | 2.8                                 | 1.5  | 4.9   | 0.1         | 137.3       |
|                              |                                          | 2                            | 13 | 28.3                                | 15.6 | 34.9  | 2.1         | 43.8        |
|                              |                                          | 3                            | 1  | 23.8                                | 23.8 | 23.8  | 23.8        | 23.8        |
|                              | PICU/CICU                                | 1                            | 50 | 2.1                                 | 1.1  | 5.4   | 0.3         | 28.6        |
|                              |                                          | 2                            | 11 | 34.6                                | 21.3 | 45.1  | 7.9         | 77.1        |
|                              |                                          | 3                            | 5  | 65.1                                | 60.2 | 123.5 | 33.7        | 145.5       |
| Tertiary non-designated unit | Standalone surgical centre               | 1                            | 7  | 0.4                                 | 0.3  | 0.5   | 0.2         | 5.0         |
|                              |                                          | 2                            | 3  | 14.1                                | 11.5 | 28.3  | 8.9         | 42.5        |
|                              |                                          | 4                            | 2  | 70.8                                | 43.9 | 97.6  | 17.0        | 124.5       |
|                              | PICU/CICU                                | 1                            | 2  | 0.6                                 | 0.5  | 0.6   | 0.5         | 0.6         |
|                              |                                          | 2                            | 3  | 25.5                                | 15.3 | 44.8  | 5.2         | 64.2        |
|                              |                                          | 3                            | 2  | 39.9                                | 28.5 | 51.3  | 17.1        | 62.7        |
| Non-tertiary unit            | Standalone surgical centre               | 1                            | 14 | 0.4                                 | 0.3  | 0.7   | 0.2         | 8.2         |
|                              |                                          | 2                            | 7  | 2.2                                 | 1.7  | 4.9   | 0.3         | 19.8        |
|                              |                                          | 3                            | 1  | 33.6                                | 33.6 | 33.6  | 33.6        | 33.6        |
|                              |                                          | 6                            | 1  | 66.5                                | 66.5 | 66.5  | 66.5        | 66.5        |
|                              | PICU/CICU                                | 1                            | 3  | 0.6                                 | 0.5  | 1.8   | 0.4         | 3.1         |
|                              |                                          | 2                            | 9  | 6.9                                 | 4    | 24.6  | 1.7         | 54.6        |
|                              |                                          | 3                            | 4  | 36.4                                | 25.1 | 49.9  | 7.8         | 73.7        |
|                              |                                          | 4                            | 1  | 75.1                                | 75.1 | 75.1  | 75.1        | 75.1        |

\*A neonatal episode is defined as a single continuous stay within a single unit.

**Supplement 4: Survival to surgical centre for the whole cohort (n=1319)**

|                                                           | <b>Place of Delivery</b>                 |                                             |                                   |
|-----------------------------------------------------------|------------------------------------------|---------------------------------------------|-----------------------------------|
|                                                           | <b>Tertiary designated unit, N = 337</b> | <b>Tertiary non-designated unit, N = 89</b> | <b>Non-tertiary unit, N = 233</b> |
| <b>Survival to discharge to surgical centre, n (%)</b>    | 261 (77%)                                | 82 (92%)                                    | 222 (95%)                         |
| <b>Age transfer to surgical centre, median days (IQR)</b> | 4 (1.8-8)                                | 1 (0.3-1.6)                                 | 0.5 (0.3-0.6)                     |

**Supplement 5: Sub-analysis of discharge outcomes**

|                                     | <b>N</b> | <b>Discharged to Paediatric ward</b> | <b>Discharged to a stand-alone surgical centre/PICU/CICU</b> | <b>Discharged to the local hospital</b> | <b>Discharged home</b> | <b>Length of stay to discharge home</b> |
|-------------------------------------|----------|--------------------------------------|--------------------------------------------------------------|-----------------------------------------|------------------------|-----------------------------------------|
| <b>Neonatal surgical unit</b>       | 660      | 46 (7%)                              | 67 (10%)                                                     | 13 (2%)                                 | 338 (63%)              | 27 (16,47)                              |
| <b>Tertiary designated unit</b>     | 337      | 4 (1%)                               | 154 (46%)                                                    | 1 (3%)                                  | 101 (30%)              | 14 (2-34)                               |
|                                     | 214      | 4 (2%)                               | 31 (15%)                                                     | 1 (0.5%)                                | 101 (47%)              | 32.3 (20.54-45.4)                       |
| <b>Tertiary non-designated unit</b> | 89       | 4 (4%)                               | 20 (2%)                                                      | 0                                       | 51 (78%)               | 19 (12-30)                              |
|                                     | 80       | 4 (5%)                               | 11 (14%)                                                     | 0                                       | 51 (64%)               | 20.3 (16-34.7)                          |
| <b>Non-tertiary unit</b>            | 233      | 5 (2%)                               | 40 (17%)                                                     | 1 (0.4%)                                | 155 (83%)              | 19 (11-32)                              |
|                                     | 216      | 5 (2%)                               | 23 (10%)                                                     | 1 (0.5%)                                | 155 (72%)              | 20.2 (12/6-33/6)                        |

**Supplement 6: UK Neonatal Collaborative units in England and Wales**

| <b>Institution</b>                             | <b>Lead</b>           |
|------------------------------------------------|-----------------------|
| Airedale General Hospital                      | Dr Matthew Babirecki  |
| Arrove Park Hospital                           | Dr Anand Kamalanathan |
| Barnet Hospital                                | Dr Clare Cane         |
| Barnsley District General Hospital             | Dr Kavi Aucharaz      |
| Basildon Hospital                              | Dr Aashish Gupta      |
| Basingstoke & North Hampshire Hospital         | Dr Alistair Ewing     |
| Bassetlaw District General Hospital            | Dr L M Wong           |
| Bedford Hospital                               | Dr Anita Mittal       |
| Birmingham City Hospital                       | Dr Lindsay Halpern    |
| Birmingham Heartlands Hospital                 | Dr Pinki Surana       |
| Birmingham Women's Hospital                    | Dr Matt Nash          |
| Bradford Royal Infirmary                       | Dr Sam Wallis         |
| Broomfield Hospital, Chelmsford                | Dr Ahmed Hassan       |
| Calderdale Royal Hospital                      | Dr Karin Schwarz      |
| Chelsea & Westminster Hospital                 | Dr Shu-Ling Chuang    |
| Chesterfield & North Derbyshire Royal Hospital | Dr Penelope Young     |
| Colchester General Hospital                    | Dr Ramona Onita       |
| Conquest Hospital                              | Dr Graham Whincup     |
| Countess of Chester Hospital                   | Dr Joanne Dangerfield |
| Croydon University Hospital                    | Dr Jocelyn Morris     |
| Cumberland Infirmary                           | Dr Yee Aung           |
| Darent Valley Hospital                         | Dr Abdul Hasib        |
| Darlington Memorial Hospital                   | Dr Mehdi Garbash      |
| Derriford Hospital                             | Dr Alex Allwood       |
| Diana Princess of Wales Hospital               | Dr Pauline Adiotomre  |
| Doncaster Royal Infirmary                      | Dr Nigel Brooke       |
| Dorset County Hospital                         | Dr Abby Deketelaere   |
| East Surrey Hospital                           | Dr Toria Klutse       |
| Epsom General Hospital                         | Dr Sonia Spathis      |
| Frimley Park Hospital                          | Sathish Krishnan      |
| Furness General Hospital                       | Dr Samar Sen          |
| George Eliot Hospital                          | Dr Jez Jones          |
| Glan Clwyd Hospital                            | Dr Geedi Farah        |
| Glangwili General Hospital                     | Dr Prem Pitchaikani   |
| Gloucester Royal Hospital                      | Dr Jennifer Holman    |
| Good Hope Hospital                             | Dr Pinki Surana       |
| Great Western Hospital                         | Dr Stanley Zengeya    |
| Guy's & St Thomas' Hospital                    | Dr Geraint Lee        |
| Harrogate District Hospital                    | Dr Sobia Balal        |
| Hereford County Hospital                       | Dr Cath Seagrave      |

|                                                              |                           |
|--------------------------------------------------------------|---------------------------|
| Hillingdon Hospital                                          | Dr Tristan Bate           |
| Hinchingbrooke Hospital                                      | Dr Hilary Dixon           |
| Homerton Hospital                                            | Dr Narendra Aladangady    |
| Hull Royal infirmary                                         | Dr Hassan Gaili           |
| Ipswich Hospital                                             | Dr Matthew James          |
| James Cook University Hospital                               | Dr M Lal                  |
| James Paget Hospital                                         | Dr Oluseun Tayo           |
| Kettering General Hospital                                   | Dr Poornima Pandey        |
| Kings College Hospital                                       | Dr Ravindra Bhat          |
| King's Mill Hospital                                         | Dr Simon Rhodes           |
| Kingston Hospital                                            | Dr Jonathan Filkin        |
| Lancashire Women and Newborn Centre                          | Dr Savi Sivashankar       |
| Leeds Neonatal Service                                       | Dr Lawrence Miall         |
| Leicester General Hospital                                   | Dr Jonathan Cusack        |
| Leicester Royal Infirmary                                    | Dr Venkatesh Kairamkonda  |
| Leighton Hospital                                            | Dr Michael Grosdenier     |
| Lincoln County Hospital                                      | Dr Ajay Reddy             |
| Lister Hospital                                              | Dr J Kefas                |
| Liverpool Women's Hospital                                   | Dr Alison Bedford Russell |
| Luton & Dunstable Hospital                                   | Dr Jennifer Birch         |
| Macclesfield District General Hospital                       | Dr Gail Whitehead         |
| Manor Hospital                                               | Dr Ashok Karupaiah        |
| Medway Maritime Hospital                                     | Dr Ghada Ramadan          |
| Milton Keynes General Hospital                               | Dr I Misra                |
| Musgrove Park Hospital                                       | Dr Nicola Johnson         |
| New Cross Hospital                                           | Dr Richard Heaver         |
| Newham General Hospital                                      | Dr Mohammad Alam          |
| Nobles Hospital                                              | Dr Prakash Thiagarajan    |
| Norfolk & Norwich University Hospital                        | Dr Muthukumar             |
| North Devon District Hospital                                | Dr Tiziana Fragapane      |
| North Manchester General Hospital                            | Dr Ngozi Edi-Osagie       |
| North Middlesex University Hospital                          | Dr Cheentan Singh         |
| Northampton General Hospital                                 | Dr Subodh Gupta           |
| Northumbria Specialist Emergency Care Hospital               | Jess Reynolds             |
| Northwick Park Hospital                                      | Dr Khadija Ben-Sasi       |
| Nottingham City Hospital                                     | Dr Steven Wardle          |
| Nottingham University Hospital (QMC)                         | Dr Steven Wardle          |
| Ormskirk District General Hospital                           | Dr Victoria Nesbitt       |
| Oxford University Hospitals, John Radcliffe Hospital         | Dr Eleri Adams            |
| Peterborough City Hospital                                   | Dr Katharine McDevitt     |
| Pilgrim Hospital                                             | Dr Ruchika Gupta          |
| Pinderfields General Hospital (Pontefract General Infirmary) | Dr David Gibson           |
| Poole General Hospital                                       | Prof Minesh Khashu        |



|                                                                |                       |
|----------------------------------------------------------------|-----------------------|
| Prince Charles Hospital                                        | Dr Iyad Al-Muzaffar   |
| Princess of Wales Hospital                                     | Dr Kate Creese        |
| Princess Alexandra Hospital                                    | Dr Chinnappa Reddy    |
| Princess Anne Hospital                                         | Dr Mark Johnson       |
| Princess Royal Hospital                                        | Dr Prashanth Bhat     |
| Princess Royal Hospital (previously Royal Shrewsbury Hospital) | Dr Patricia Cowley    |
| Princess Royal University Hospital                             | Dr Rashmi Gandhi      |
| Queen Alexandra Hospital                                       | Dr Charlotte Groves   |
| Queen Charlotte's Hospital                                     | Dr Lidia Tyszcuzk     |
| Queen Elizabeth Hospital, Gateshead                            | Dr Shilpa Ramesh      |
| Queen Elizabeth Hospital, King's Lynn                          | Dr Glynis Rewitzky    |
| Queen Elizabeth Hospital, Woolwich - see notes                 | Mrs Julia Croft       |
| Queen Elizabeth the Queen Mother Hospital                      | Dr Bushra Abdul-Malik |
| Queen's Hospital, Burton on Trent                              | Dr Dominic Muogbo     |
| Queen's Hospital, Romford                                      | Dr Ambalika Das       |
| Rosie Maternity Hospital, Addenbrookes                         | Dr Angela D'Amore     |
| Rotherham District General Hospital                            | Dr Soma Sengupta      |
| Royal Albert Edward Infirmary                                  | Dr Christos Zipitis   |
| Royal Berkshire Hospital                                       | Dr Peter De Halpert   |
| Royal Bolton Hospital                                          | Dr Archana Mishra     |
| Royal Cornwall Hospital                                        | Dr Chris Warren       |
| Royal Derby Hospital                                           | Dr John McIntyre      |
| Royal Devon & Exeter Hospital                                  | Dr Nagendra Venkata   |
| Royal Hampshire County Hospital                                | Dr Lucinda Winckworth |
| Royal Lancaster Infirmary                                      | Dr Joanne Fedee       |
| Royal Oldham Hospital                                          | Dr Anitha Vayalakkad  |
| Royal Preston Hospital                                         | Dr Raju Narasimhan    |
| Royal Stoke University Hospital                                | Dr Lee Abbott         |
| Royal Surrey County Hospital                                   | Dr Ben Obi            |
| Royal Sussex County Hospital                                   | Dr Prashanth Bhat     |
| Royal United Hospital                                          | Dr Stephen Jones      |
| Royal Victoria Infirmary                                       | Dr Richard Hearn      |
| Russells Hall Hospital                                         | Dr Anjali Petkar      |
| Salisbury District Hospital                                    | Dr Jim Baird          |
| Scarborough General Hospital                                   | Dr Kirsten Mack       |
| Scunthorpe General Hospital                                    | Dr Pauline Adiotomre  |
| Singleton Hospital                                             | Dr Arun Ramachandran  |
| Southend Hospital                                              | Dr Vineet Gupta       |
| Southmead Hospital                                             | Dr Faith Emery        |
| St George's Hospital                                           | Dr Charlotte Huddy    |
| St Helier Hospital                                             | Dr Salim Yasin        |
| St Mary's Hospital, IOW                                        | Dr Akinsola Ogundiya  |
| St Mary's Hospital, London                                     | Dr Lidia Tyszcuzk     |
| St Mary's Hospital, Manchester                                 | Dr Ngozi Edi-Osagie   |

|                                             |                       |
|---------------------------------------------|-----------------------|
| St Michael's Hospital                       | Dr Pamela Cairns      |
| St Peter's Hospital                         | Dr Vennila Ponnusamy  |
| St Richard's Hospital                       | Dr Victoria Sharp     |
| Stepping Hill Hospital                      | Dr Carrie Heal        |
| Stoke Mandeville Hospital                   | Dr Sanjay Salgia      |
| Sunderland Royal Hospital                   | Dr Imran Ahmed        |
| Tameside General Hospital                   | Dr Jacqueline Birch   |
| The Grange University Hospital              | Dr Sunil Reddy        |
| The Jessop Wing, Sheffield                  | Dr Porus Bastani      |
| The Royal Free Hospital                     | Dr Marice Theron      |
| The Royal London Hospital - Constance Green | Dr Divyen Shah        |
| Torbay Hospital                             | Dr Siba Paul          |
| Tunbridge Wells Hospital                    | Dr Se-Yeon Park       |
| University College Hospital                 | Dr Giles Kendall      |
| University Hospital Coventry                | Dr Puneet Nath        |
| University Hospital Lewisham                | Mrs Julia Croft       |
| University Hospital of North Durham         | Dr Mehdi Garbash      |
| University Hospital of North Tees           | Dr Hari Kumar         |
| University Hospital of Wales                | Dr Nitin Goel         |
| Victoria Hospital, Blackpool                | Dr Chris Rawlingson   |
| Warrington Hospital                         | Dr Delyth Webb        |
| Warwick Hospital                            | Dr Bird               |
| Watford General Hospital                    | Dr Sankara Narayanan  |
| West Cumberland Hospital                    | Dr Yee Aung           |
| West Middlesex University Hospital          | Dr Elizabeth Eyre     |
| West Suffolk Hospital                       | Dr Jageer Mohammed    |
| Wexham Park Hospital                        | Dr Sanjay Jaisal      |
| Whipps Cross University Hospital            | Dr Caroline Sullivan  |
| Whiston Hospital                            | Dr Ros Garr           |
| Whittington Hospital                        | Dr Wynne Leith        |
| William Harvey Hospital                     | Dr Vimal Vasu         |
| Worcestershire Royal Hospital               | Dr Anna Gregory       |
| Worthing Hospital                           | Dr Katia Vamvakiti    |
| Wrexham Maelor Hospital                     | Dr Brendan Harrington |
| Wythenshawe Hospital                        | Dr Ngozi Edi-Osagie   |
| Yeovil District Hospital                    | Dr Megan Eaton        |
| York District Hospital                      | Dr Sundeep Sandhu     |
| Ysbyty Gwynedd                              | Dr Michael Cronin     |
